# Supplementary material for: Modulating stereoselectivity and catalytic efficiency of carbenoid reactions catalysed by self-sufficient P450s
Source: Royal Society of Chemistry journal article supplement (doi:10.1039/d3cy01258a), 2023-12-08
Supplement: d3cy01258a1.pdf [file d3cy01258a1.pdf]

1  
2  
3  
4  
5  
6  
7  
8  
9

## Electronic Supplementary Information

### **Modulating stereoselectivity and catalytic efficiency of carbenoid reactions catalysed by Self-sufficient P450s**

Binhao Wang, Cuiping You, Guochao Xu,\* and Ye Ni,\*

*Key laboratory of industrial Biotechnology, Ministry of Education, School of Biotechnology, Jiangnan  
University, Wuxi214122, Jiangsu, China. Phone number: (+86) 0510-85918206.*

\*Corresponding authors: [yni@jiangnan.edu.cn](mailto:yni@jiangnan.edu.cn) (Y Ni); [guochaouxu@jiangnan.edu.cn](mailto:guochaouxu@jiangnan.edu.cn) (Guochao Xu).

## 10 **1. Materials and Methods**

### 11 **1.1 Materials**

12 The racemic standard of ethyl 2-phenylcyclopropane carboxylate and styrene were obtained from  
13 MACLIN. Ethyl diazoacetate was provided by Damas-beta. Other required reagents, such as ethanol,  
14 acetonitrile, N-hexane, etc., were purchased from Sigma Aldrich.

### 15 **1.2 Strain and amino acid sequence**

16 *E. coli* BL21 (DE3) was employed for the expression of recombinant proteins, six self-sufficient P450s  
17 include: P450<sub>TT</sub> (Genbank number: WP\_055423153.1), P450<sub>JT</sub> (Genbank number: WP\_104007096.1),  
18 CYP505X (Genbank number: XP\_754698), CYP152K6 (GenBank number: 6FYJ\_A), CviUPO  
19 (GenBank number: 7ZCL\_B), and CYP505A30 (GenBank number: XP\_003663647.1). Above  
20 nucleotide sequences were synthesized by Tianlin (Wuxi) Technology Co., LTD. and subsequently  
21 cloned into pET 28a (+) vector. For the positive control experiments, the nucleotide sequences of  
22 P450<sub>BM3</sub>, myoglobin, and cytochrome C were synthesized according to the references.<sup>1-3</sup>

### 23 **1.3 Medium**

24 Luria-Bertani (LB) medium (g·L<sup>-1</sup>): peptone 10.0, yeast extract 5.0, sodium chloride 10.0, pH 7.2,  
25 solid medium with 2% AGAR.

26 Super Broth (TB) medium (g·L<sup>-1</sup>): yeast extract 24.0, peptone 12.0, K<sub>2</sub>HPO<sub>3</sub> 16.4, KH<sub>2</sub>PO<sub>3</sub> 2.3,  
27 glycerol 5.0.

### 28 **1.4 Mutagenesis of substitution of the key axial residues of P450s**

29 Substitution of key axial residues in P450s was performed through whole plasmid PCR mutagenesis,  
30 using six P450 genes as templates. The primers required for introducing the critical residue changes  
31 were exclusively synthesized by Sangon Biotech (Shanghai) Co., LTD. (**Table S1**). PCR amplification  
32 system contained complementary primers and used KOD-Plus-Neo DNA polymerase to amplification  
33 sequence. PCR program involved an initial pre-denaturation at 94°C for 4 min, followed by  
34 amplification for 25 cycles with denaturation at 98°C for 10 s, annealing at 55°C for 15 s and  
35 elongation at 72°C for 5 min, and then further elongation at 72°C for 10 min. The plasmids verified  
36 by nucleic acid glue and digested with 1 μL of DpnI for 0.5 h at 37°C to remove the methylated  
37 templates. Then 10 μL of the digestion mixture were transformed into *E. coli* BL21 (DE3). Single

38 colonies were picked up and cultivated in LB medium (50 µg/mL Kan). The plasmids of mutations  
 39 were confirmed by sequencing.

40

**Table S1.** List of primers

| Primer                      | Sequence                     |
|-----------------------------|------------------------------|
| P450 <sub>TT</sub> -C385H-1 | GCCGAGGTGCTGATGGGCGCCGTAACC  |
| P450 <sub>TT</sub> -C385H-2 | CATCAGCACCTCGGCCGTAACCTCGG   |
| P450 <sub>TT</sub> -C385S-1 | CATCAGAGCCTCGGCCGTAACCTCGG   |
| P450 <sub>TT</sub> -C385S-2 | GCCGAGGCTCTGATGGGCGCCGTAACC  |
| P450 <sub>JT</sub> -C377S-1 | CATCAGAGCATGGGCAAAAACATCGGC  |
| P450 <sub>JT</sub> -C377S-2 | GCCCATGCTCTGATGGGCACCATAGCCG |
| P450 <sub>JT</sub> -C377H-1 | CATCAGCACATGGGCAAAAACATCGGC  |
| P450 <sub>JT</sub> -C377H-2 | GCCCATGTGCTGATGGGCACCATAGCC  |
| CYP505A30-C411S-1           | CGTGCGAGCATCGGGCGTCCTTTCGCG  |
| CYP505A30-C411S-2           | CCCGATGCTCGCACGCATACCAGTACCG |
| CYP505A30-C411H-1           | CGTGCGCACATCGGGCGTCCTTTCGCG  |
| CYP505A30-C411H-2           | CCCGATGTGCGCACGCATACCAGTACC  |
| CYP505X-C414H-1             | CGCGCACACATTGGTCGTCCGTTTGCG  |
| CYP505X-C414H-2             | ACCAATGTGTGCGCGCATAACCGTTGCC |
| CYP505X-C414S-1             | CGCGCAAGCATTGGTCGTCCGTTTGCG  |
| CYP505X-C414S-2             | ACCAATGCTTGCGCGCATAACCGTTGCC |
| CYP152K6-C365S-1            | CACCGCAGCGCTGGCGAATGGGTTACC  |
| CYP152K6-C365S-2            | GCCAGCGCTGCGGTGGCCCATGAAGTA  |
| CYP152K6-C365H-1            | CACCGCCACGCTGGCGAATGGGTTACC  |
| CYP152K6-C365H-2            | GCCAGCGTGGCGGTGGCCCATGAAGTA  |
| CviUPO-C20S-1               | GCTCCGAGCCCGGCTATGAACAGCCTG  |
| CviUPO-C20S-2               | AGCCGGGCTCGGAGCGCGAAATTCACCC |
| CviUPO-C20H-1               | GCTCCGCACCCGGCTATGAACAGCCTG  |
| CviUPO-C20H-2               | AGCCGGGTGCGGAGCGCGAAATTCACC  |

41

## 42 **1.5 Protein expression and purification**

43 Recombinant *E. coli* BL21 (DE3) including six P450s and variants were cultivated at 37°C and 180  
44 rpm in LB medium supplemented with 1% glucose. The cultures were grown until OD<sub>600</sub> reached  
45 0.6~0.8. Subsequently, they were induced with 0.2 mM isopropyl β-D-thiogalactopyranoside (IPTG)  
46 for gene expression. 2 mM FeSO<sub>4</sub> and 1 mM 5-aminolevulinic acid hydrochloride (ALA) were added  
47 for synthesis of iron porphyrin in the catalytic center of P450s. And further culture was conducted at  
48 16 °C, 120 rpm for 24 h. After culture, the culture medium was removed by centrifugation at 4000 rpm  
49 for 10 min. The induced cells were harvested by centrifugation (4°C, 8,000×g for 10 min) to be freeze-  
50 dried. When protein purification was required, the cells were resuspended in phosphate buffer A (25  
51 mM Tris-HCl, 300 mM NaCl, 20 mM imidazole, 5 mM β-mercaptoethanol, pH 7.4), then disrupted  
52 with ultra-sonication (work for 2 s, pause for 3 s, 150 W). The resulting supernatant was loaded onto  
53 a His-Trap HP nickel affinity column pre-equilibrated with buffer A using AKTA Avant System (GE  
54 Healthcare, USA), P450s were eluted off by a 20-300 mM imidazole gradient in buffer B (25 mM  
55 Tris-HCl, 300 mM NaCl, 300 mM imidazole, 5 mM β-mercaptoethanol, pH 7.4). The collected  
56 proteins were verified by SDS-PAGE analysis and then concentrated by an ultrafiltration tube. The  
57 target pure enzyme is subjected to the next experiment.

## 58 **1.6 Small-scale of carbenoid model reactions**

59 The reactions were initiated by adding 10 μL of styrene (1.2 M stock solution in methanol), followed  
60 by the addition of 10 μL of EDA (0.4 M stock solution in methanol) using a syringe under anaerobic  
61 conditions. The reaction mixture was stirred for 12 hours at 16°C. Upon completion of the reaction, it  
62 was terminated by adding an equal volume of 3 M HCl. The resulting solution was then centrifuged at  
63 12,000 rpm for 10 min to separate the phases. After centrifugation for 5 min, the solution was filtered  
64 using a 0.22 μm organic filter membrane. Subsequently, the analysis was performed using an  
65 ACQUITY UPC2 system by Waters Corporation, with a Trefoil CEL2 Supercritical Column (3.0 ×  
66 150 mm, 2.5 μm) employed. The mobile phase A consisted of a mixture of ethanol and acetonitrile.  
67 UV detection was carried out at a wavelength of 210 nm, with the column temperature maintained at  
68 30 °C. The flow rate was set at 1.2 mL/min, and an injection volume of 3 μL was used. It was  
69 recommended to conduct at least two parallel experiments for each group of reactions. The enzymatic  
70 cyclopropane reaction system consists of crude enzymes (**Table S2**) and purified enzymes (**Table S3**).

71

**Table S2.** Reaction system for crude enzymes

| Ingredients                     | Volume ( $\mu$ |
|---------------------------------|----------------|
| Crude enzyme                    | 3444           |
| Styrene (1.2 M)                 | 33             |
| EDA (400 mM)                    | 50             |
| NaS <sub>2</sub> O <sub>4</sub> | 33             |

72

73

**Table S3.** Reaction system for purified enzymes

| Ingredients                     | Volume ( $\mu$    |
|---------------------------------|-------------------|
| Purified Enzyme                 | 10 $\mu$ M        |
| Styrene (1.2 M)                 | 33                |
| EDA (400 mM)                    | 50                |
| NaS <sub>2</sub> O <sub>4</sub> | 33                |
| Tris·HCl buffer (100 mM         | Filled up to 2000 |

74

## 75 1.7 Phylogenetic tree analysis, Sequence analysis, Molecular modeling and Simulation

76 Phylogenetic tree was constructed using is the maximum likelihood (ML) approach, and the  
77 software used is RAxML 8.2.12 and PhyloSuite.<sup>4,5</sup> Using P450<sub>BM3</sub>, myoglobin, and six self-sufficient  
78 P450s as templates, homologous sequences was searched on the NCBI website  
79 (<https://www.ncbi.nlm.nih.gov/>), incomplete and redundant sequences were removed, and the  
80 sequences based on sequence consistency were rename. Sequence alignment was performed using the  
81 multiple sequence alignment software MAFFT,<sup>6</sup> with specific parameters: FFT-NS-2 (default)  
82 strategy, Gap opening penalty, default: 1.53, Offset (works like gap extension penalty), default: 0.0.  
83 Before the tree constructed, it is essential to determine evolutionary model for the sequence using  
84 Model Finder.<sup>7</sup> Bayesian Information Criterion (BIC) was employed to identify the best-fitting  
85 substitution model among various evolutionary models: LG+G4. Finally, online phylogenetic tree  
86 editing tool ITOL v5 (<https://itol.embl.de/>) was employed to beautify the tree.<sup>8</sup>

87 Sequence alignments and conserved analysis were conducted using online tool Clustal

88 (<https://www.genome.jp/tools-bin/clustalw>) and NCBI service (<https://www.ncbi.nlm.nih.gov/>). To  
89 further enhance the obtained results, online website ENDScript/ESPrp was utilized for beautification.<sup>9</sup>

90 With the exception of certain protein structures like P450<sub>TT</sub> and P450<sub>BM3</sub>, all molecular models  
91 were generated using AlphaFold 2. The analysis of interactions around the heme group was performed  
92 through Discovery Studio software. The enzyme-substrate complexes were further optimized using  
93 the CHARMM force field in the Discovery Studio software package. The structures were visualized and  
94 generated using Pymol.

95

96

97 **2 Standard curve of product (EPC) using ultra-performance convergence chromatography**

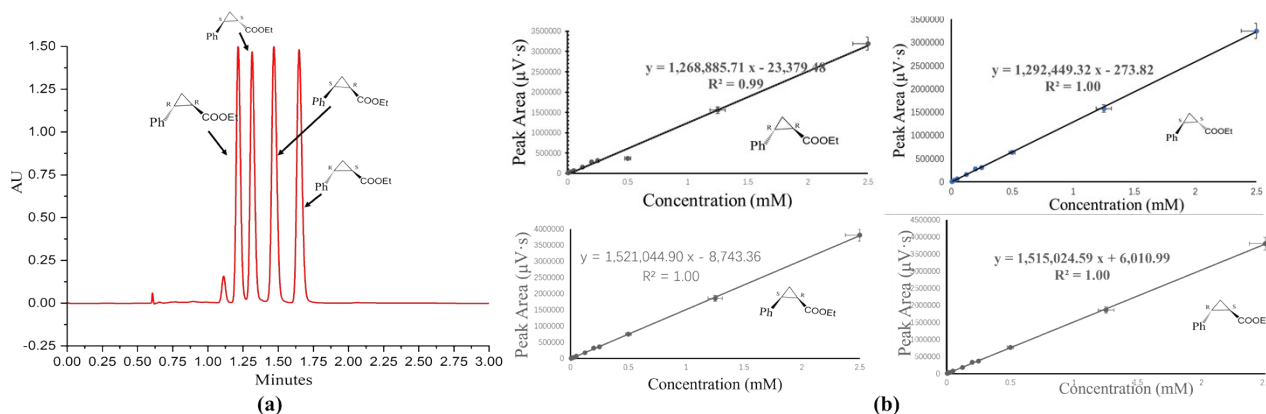

98

99 **Figure S1.** Analysis of ethyl 2-phenyl cyclopropane methane carboxylate (EPC) using ultra-  
 100 performance convergence chromatography. (a) The ultra-performance convergence chromatography  
 101 results for different configurations of EPC were as follows: (R, R)-EPC eluted at 1.216 min, (S, S)-  
 102 EPC eluted at 1.315 min, (S, R)-EPC eluted at 1.470 min, and (R, S)-EPC eluted at 1.649 min. (b)  
 103 Standard curve of different configurations of EPC analyzed by ultra-performance convergence  
 104 chromatography.

105

106 **4. Expression and purification of recombinant P450s**

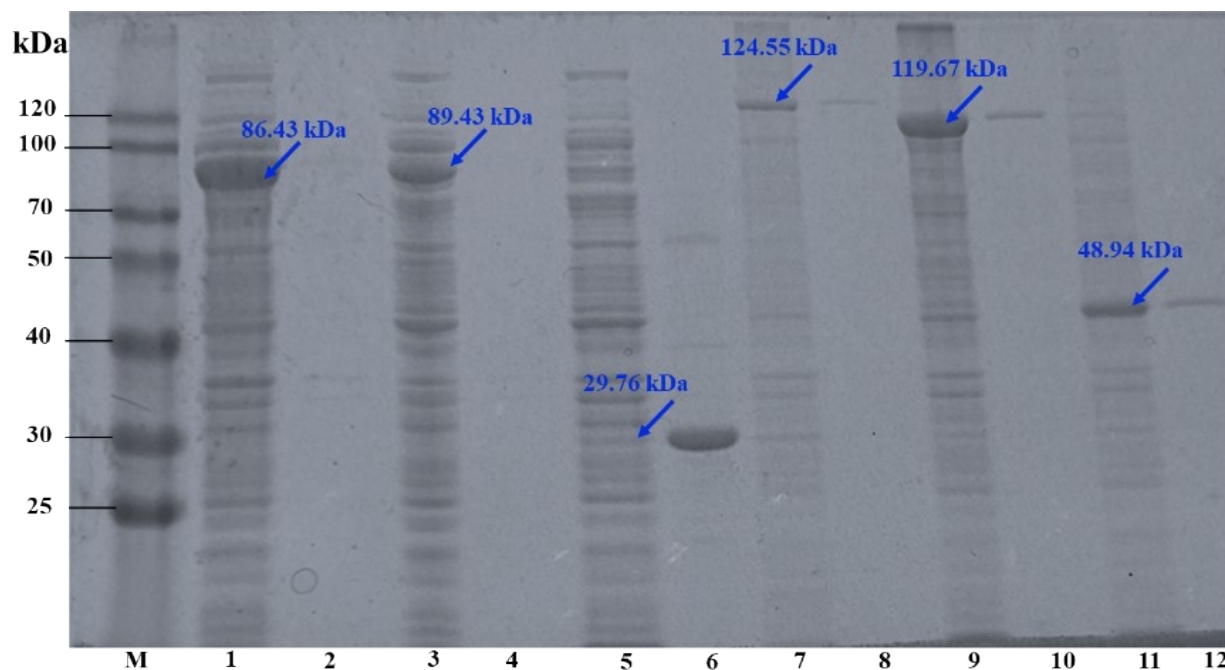

107

108 **Figure S2.** SDS-PAGE analysis of six recombinant P450s. The results showed that six different  
109 candidate genes for self-sufficient P450 skeleton enzymes were all soluble and in line with the  
110 expected protein size. M: protein Marker, lane 1~2: P450<sub>TT</sub> supernatant, precipitate; Lane 3~4: P450<sub>JT</sub>  
111 supernatant, precipitate; Lane 5~6: CviUPO supernatant, precipitate; Lane 7~8: CYP505X  
112 supernatant, precipitation; Lane 9~10: CYP505A30 supernatant, precipitate; Lane 11~12: CYP152K6  
113 supernatant, precipitate

114



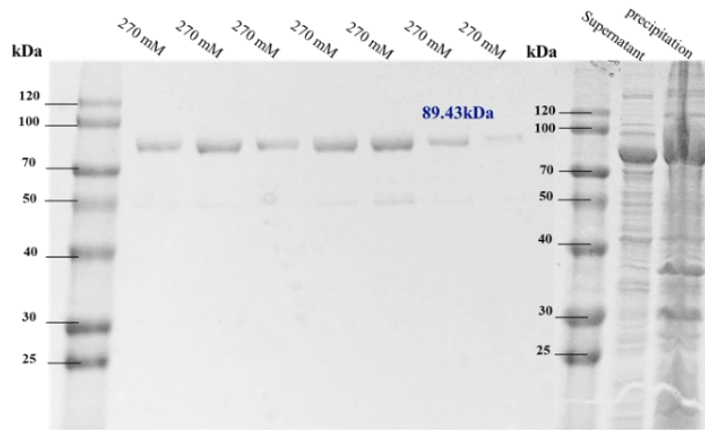

(a)

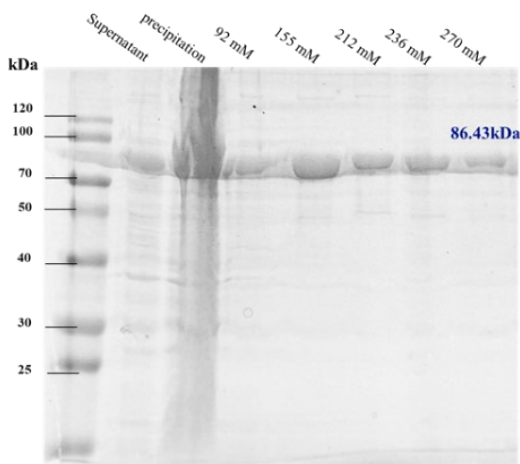

(b)

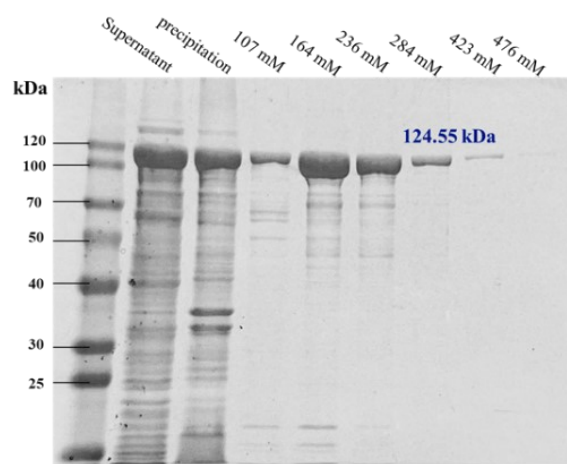

(c)

115

116 **Fig S3.** SDS-PAGE analysis of three purified self-sufficient P450 enzymes. (a) P450<sub>JT</sub>-WT. (b)

117 P450<sub>TT</sub>-C385S. (c) CYP505X-WT.

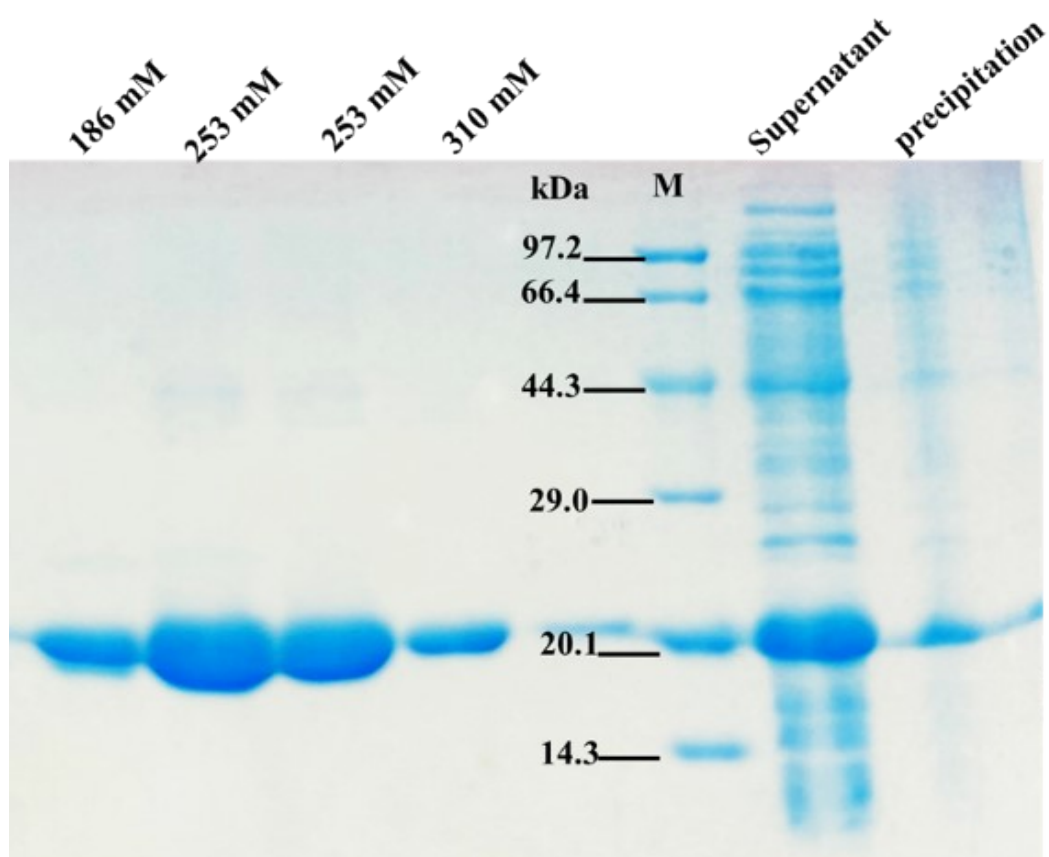

118

119

120

121

**Fig S4.** SDS-PAGE analysis of purified myoglobin

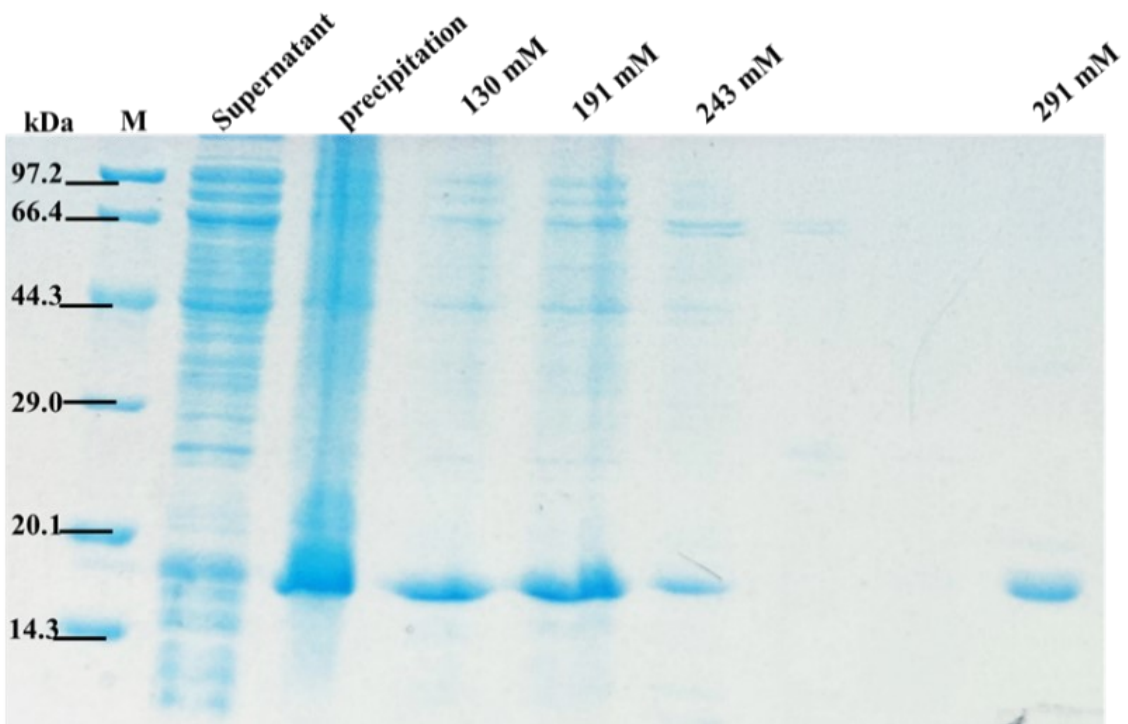

122

123

124

**Fig S5.** SDS-PAGE analysis of purified cytochrome C

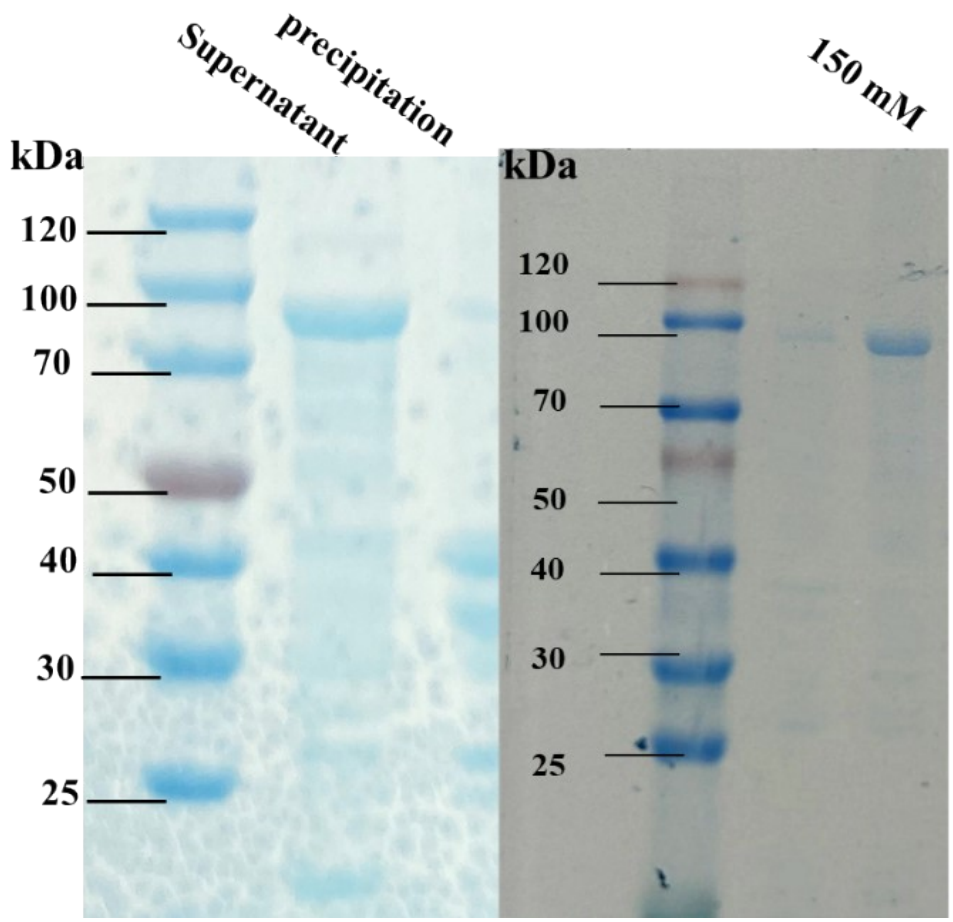

**Fig S6.** SDS-PAGE analysis of purified P450<sub>BM3</sub>

125  
126  
127  
128

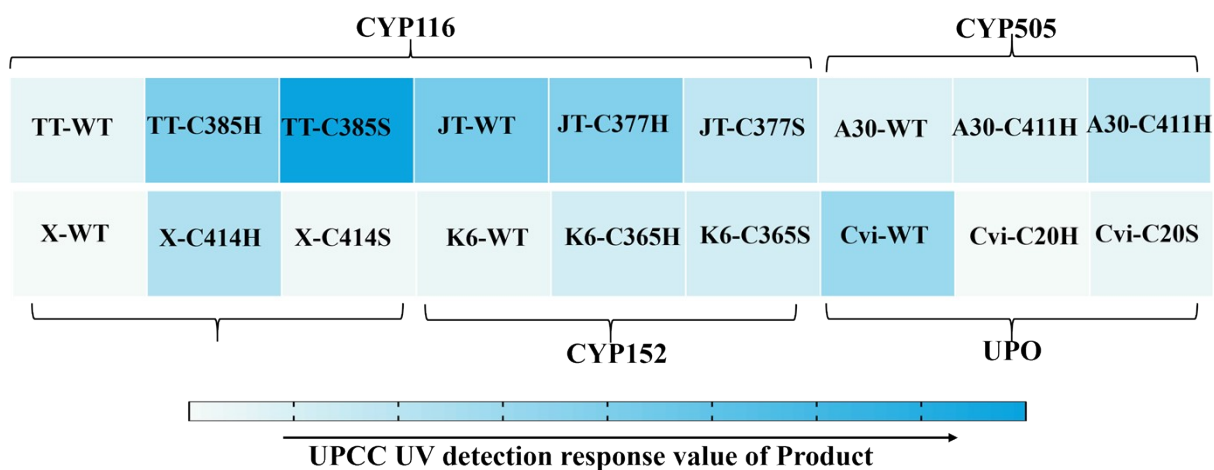

129 **5. Comparison of carbenoid model reactions catalyzed by different self-sufficient P450s**

130 **Fig S7.** Fingerprint of carbenoid model reactions catalysed by different self-sufficient P450s.  
 131 Experiments were performed using crude extract of recombinant P450s. Catalyst were normalized  
 132 such that all lyophilized cells added to buffer in the same amount for ultrasonication. Product was  
 133 determined by ultra-performance convergence chromatography.  
 134

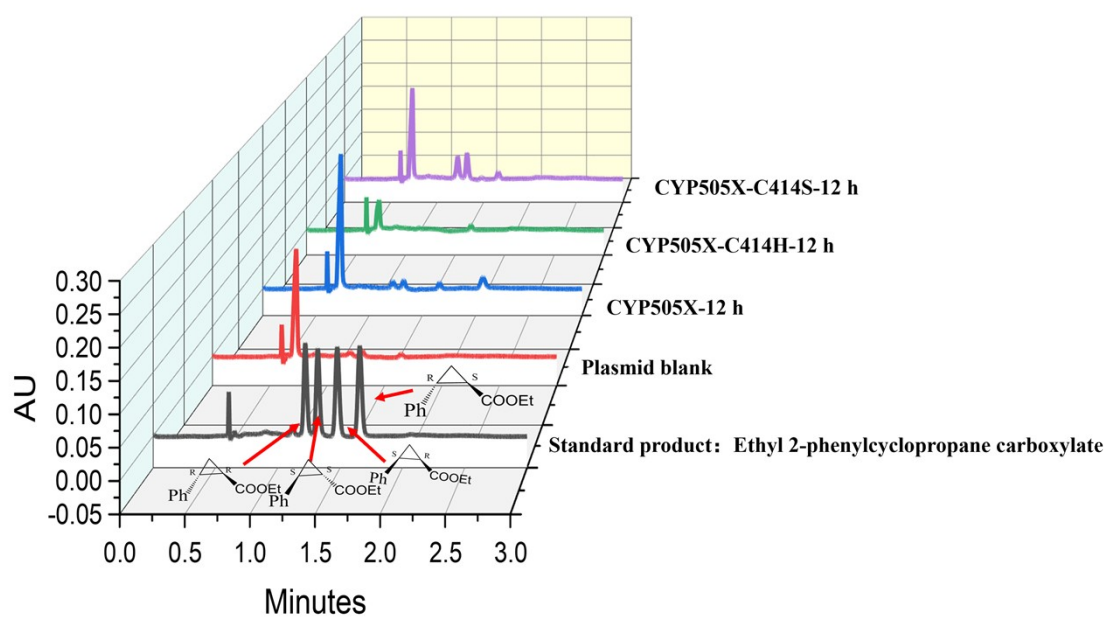

135

136 **Fig S8.** Ultra-performance convergence chromatography analysis of reactions catalyzed by crude  
 137 enzymes of P450<sub>TT</sub> and its variants.

138

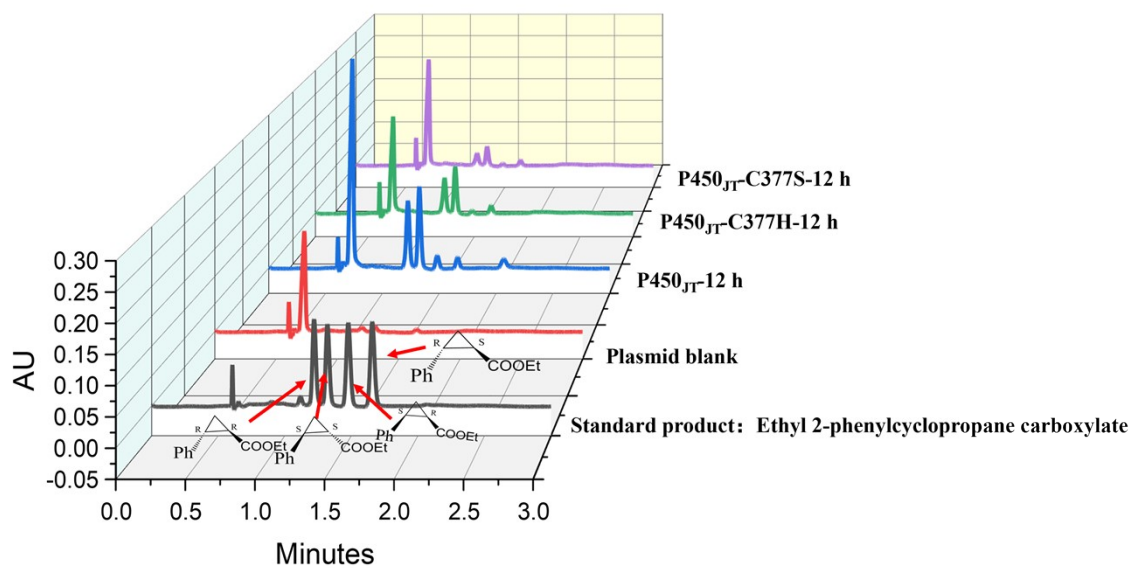

139

140 **Fig S9.** Ultra-performance convergence chromatography analysis of reactions catalyzed by crude  
 141 enzymes of P450<sub>JT</sub> and its variants.

142

143

144

145

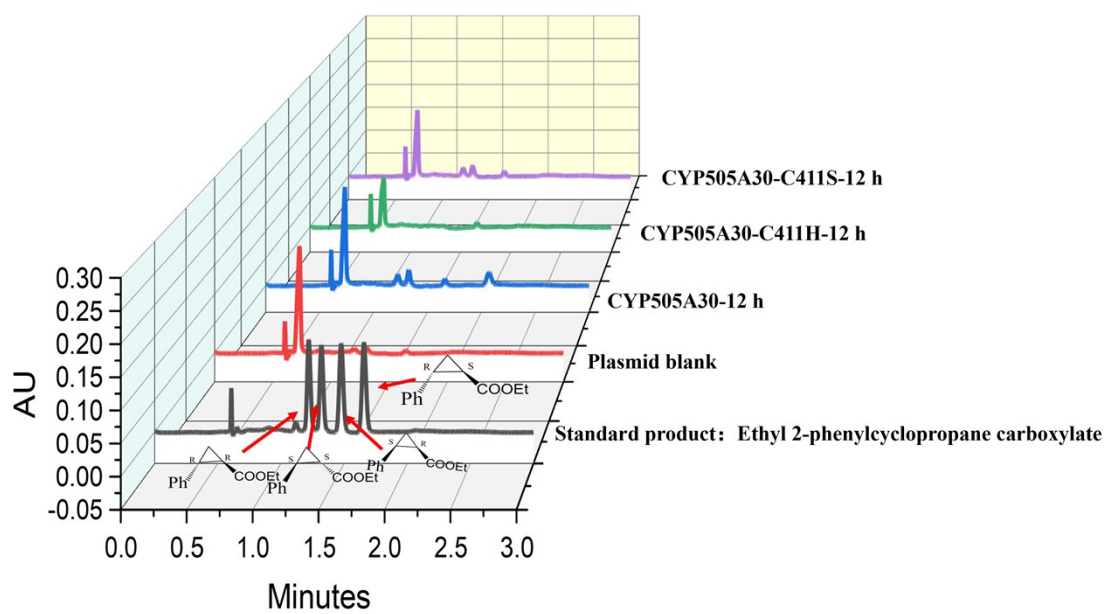

146

147 **Fig S10.** Ultra-performance convergence chromatography analysis of reactions catalyzed by crude  
 148 enzymes of CYP505A30 and its variants.

149

150



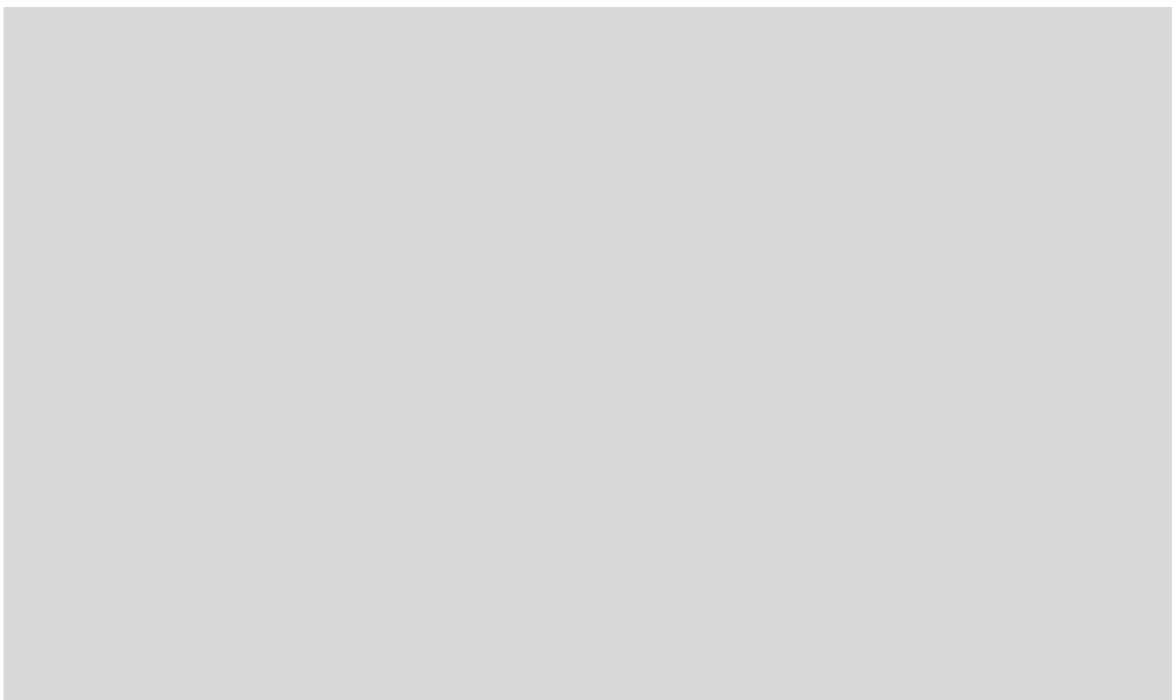

151

152 **Fig S11.** Ultra-performance convergence chromatography analysis of reactions catalyzed by crude

153

enzymes of CYP505X and its variants.

154

155

156

157

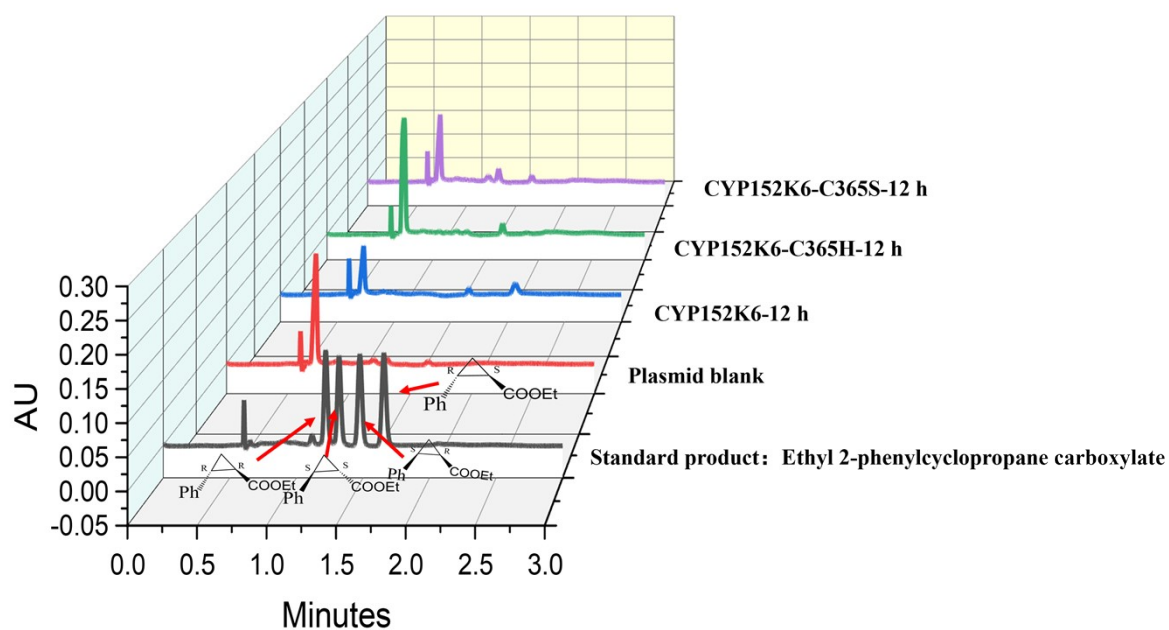

158

159 **Fig S12.** Ultra-performance convergence chromatography analysis of reactions catalyzed by crude  
 160 enzymes of CYP152K6 and its variants.

161

162

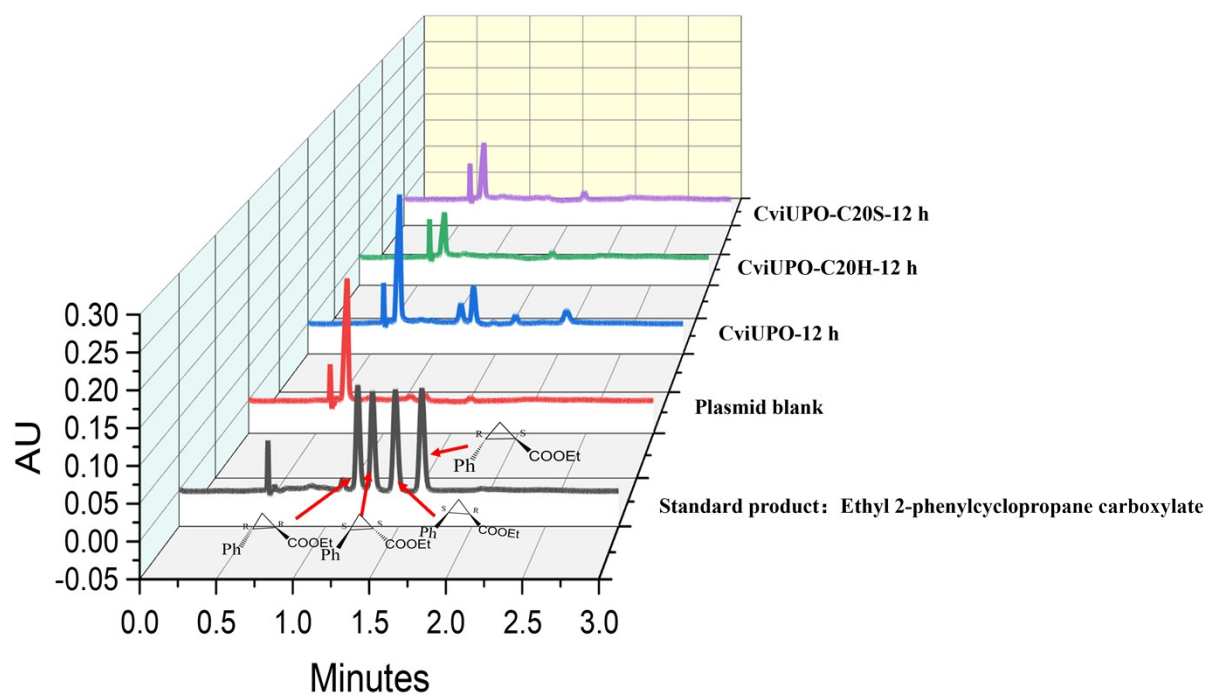

163

164 **Fig S13.** Ultra-performance convergence chromatography analysis of reactions catalyzed by crude  
 165 enzymes of CviUPO and its variants.  
 166

167 **6. Comparison of turnover frequencies (TOFs) and stereoselectivity of P450s**

168 **Table S4.** Comparison of turnover frequencies (TOFs) and stereoselectivity of carbenoid model  
 169 reaction catalyzed by different purified P450s

| Purified Enzymes          | TOF (min <sup>-1</sup> )<br>1) | de <sub>E</sub> (%) | ee <sub>cis</sub> (%) | ee <sub>trans</sub> (%) |
|---------------------------|--------------------------------|---------------------|-----------------------|-------------------------|
| P450 <sub>TT</sub> -WT    | 0.75                           | 94.0                | 99.9                  | 79.8                    |
| P450 <sub>TT</sub> -C285H | 0.80                           | 95.4                | 99.9                  | 83.3                    |
| P450 <sub>TT</sub> -C285S | 1.50                           | 31.5                | 58.0                  | 20.9                    |
| P450 <sub>JT</sub> -WT    | 1.20                           | 50.7                | 68.0                  | 33.4                    |
| P450 <sub>JT</sub> -C377H | 0.45                           | 84.0                | 99.9                  | 56.7                    |
| P450 <sub>JT</sub> -C377S | 0.70                           | 83.3                | 93.5                  | 51.9                    |
| CYP505X                   | 0.95                           | 91.6                | 99.9                  | 75.8                    |
| P411-CIS                  | 0.40                           | 99.9                | 99.9                  | n.d.                    |
| P450-CIS                  | 0.30                           | 99.9                | 99.9                  | n.d.                    |
| Myoglobin                 | 0.50                           | 81.1                | 99.9                  | 99.9                    |
| Cytochrome C              | 0.30                           | 84.4                | 69.2                  | 99.9                    |

171 **8. Residues interacted with the heme cofactors of different P450s**

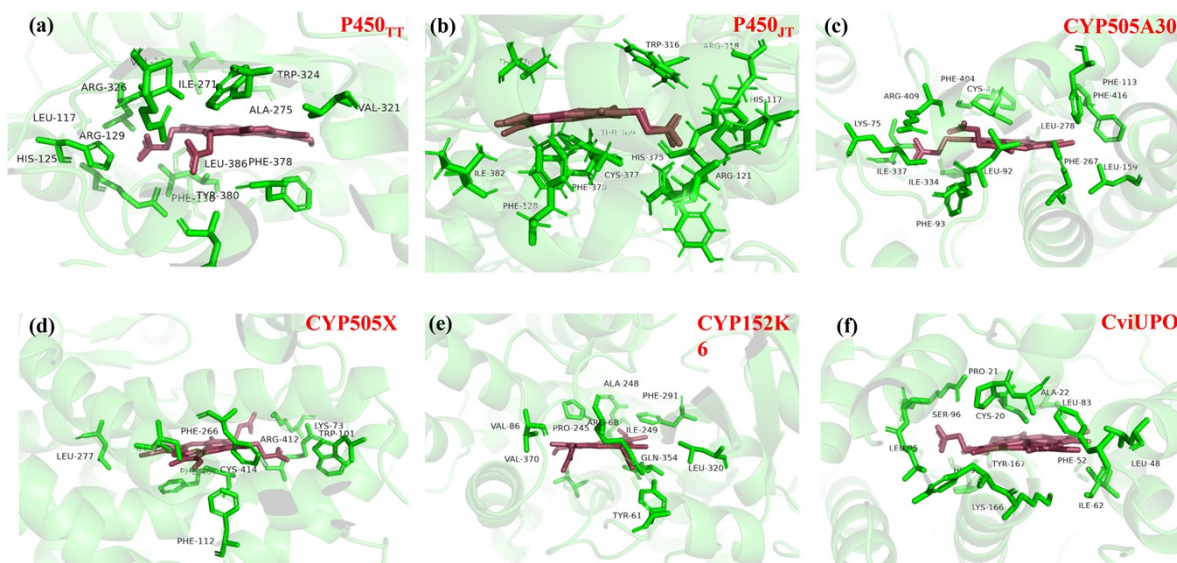

172

173 **Fig S14.** Residues interacted with the heme cofactors of different P450s. Molecular simulations were  
174 conducted on the heme pocket of the following proteins: (a) P450<sub>TT</sub> (PDB: 6GII), (b) P450<sub>JT</sub>  
175 (homology model built using AlphaFold 2), (c) CYP505A30 (homology model built using AlphaFold  
176 2), (d) CYP505X (homology model built using AlphaFold 2), (e) CYP152K6 (homology model built  
177 using AlphaFold 2), and (f) CviUPO (homology model built using AlphaFold 2). The heme cofactor  
178 (represented in red) and the surrounding residues were visualized as sticks.

179

180 **Reference**

- 181 1. Z. J. Wang, H. Renata, N. E. Peck, C. C. Farwell, P. S. Coelho and F. H. Arnold, *Angew Chem Int Ed Engl*, 2014,  
182 **53**, 6810-6813.
- 183 2. T. Heel, J. A. McIntosh, S. C. Dodani, J. T. Meyerowitz and F. H. Arnold, *Chembiochem*, 2014, **15**, 2556-2562.
- 184 3. S. B. J. Kan, X. Huang, Y. Gumulya, K. Chen and F. H. Arnold, *Nature*, 2017, **552**, 132-136.
- 185 4. A. Stamatakis, P. Hoover and J. Rougemont, *Syst Biol*, 2008, **57**, 758-771.
- 186 5. D. Zhang, F. L. Gao, I. Jakovlic, H. Zou, J. Zhang, W. X. Li and G. T. Wang, *Mol Ecol Resour*, 2020, **20**, 348-355.
- 187 6. K. Katoh, J. Rozewicki and K. D. Yamada, *Brief Bioinform*, 2019, **20**, 1160-1166.
- 188 7. S. Kalyaanamoorthy, B. Q. Minh, T. K. F. Wong, A. von Haeseler and L. S. Jermiin, *Nat Methods*, 2017, **14**, 587-+.
- 189 8. I. Letunic and P. Bork, *Nucleic Acids Res*, 2021, **49**, W293-W296.
- 190 9. X. Robert and P. Gouet, *Nucleic Acids Res*, 2014, **42**, W320-W324.

191
