# Supplementary material for: Modulating stereoselectivity and catalytic efficiency of carbenoid reactions catalysed by self-sufficient P450s
Source: Royal Society of Chemistry journal article supplement (doi:10.1039/d3cy01258a), 2023-12-08
Supplement: d3cy01258a2.pdf [file d3cy01258a2.pdf]

1

## Electronic Supplementary Information

2

3

### **Modulating stereoselectivity and catalytic efficiency of carbenoid reactions**

4

#### **catalysed by Self-sufficient P450s**

5

Binhao Wang, Cuiping You, Guochao Xu,\* and Ye Ni,\*

6

*Key laboratory of industrial Biotechnology, Ministry of Education, School of*

7

*Biotechnology, Jiangnan University, Wuxi214122, Jiangsu, China. Phone number:*

8

*(+86) 0510-85918206.*

9

\*Corresponding authors: [yni@jiangnan.edu.cn](mailto:yni@jiangnan.edu.cn) (Y Ni); [guochaoxu@jiangnan.edu.cn](mailto:guochaoxu@jiangnan.edu.cn) (Guochao Xu).

10

## 11 **1. Materials and Methods**

### 12 **1.1 Materials**

13 The racemic standard of ethyl 2-phenylcyclopropane carboxylate and styrene were obtained from  
14 MACLIN. Ethyl diazoacetate was provided by Damas-beta. Other required reagents, such as ethanol,  
15 acetonitrile, N-hexane, etc., were purchased from Sigma Aldrich.

### 16 **1.2 Strain and amino acid sequence**

17 *E. coli* BL21 (DE3) was employed for the expression of recombinant proteins, six self-sufficient P450s  
18 include: P450<sub>TT</sub> (Genbank number: WP\_055423153.1), P450<sub>JT</sub> (Genbank number: WP\_104007096.1),  
19 CYP505X (Genbank number: XP\_754698), CYP152K6 (GenBank number: 6FYJ\_A), CviUPO  
20 (GenBank number: 7ZCL\_B), and CYP505A30 (GenBank number: XP\_003663647.1). Above  
21 nucleotide sequences were synthesized by Tianlin (Wuxi) Technology Co., LTD. and subsequently  
22 cloned into pET 28a (+) vector. For the positive control experiments, the nucleotide sequences of  
23 P450<sub>BM3</sub>, myoglobin, and cytochrome C were synthesized according to the references.<sup>1-3</sup>

### 24 **1.3 Medium**

25 Luria-Bertani (LB) medium (g·L<sup>-1</sup>): peptone 10.0, yeast extract 5.0, sodium chloride 10.0, pH 7.2,  
26 solid medium with 2% AGAR.

27 Super Broth (TB) medium (g·L<sup>-1</sup>): yeast extract 24.0, peptone 12.0, K<sub>2</sub>HPO<sub>3</sub> 16.4, KH<sub>2</sub>PO<sub>3</sub> 2.3,  
28 glycerol 5.0.

### 29 **1.4 Mutagenesis of substitution of the key axial residues of P450s**

30 Substitution of key axial residues in P450s was performed through whole plasmid PCR mutagenesis,  
31 using six P450 genes as templates. The primers required for introducing the critical residue changes  
32 were exclusively synthesized by Sangon Biotech (Shanghai) Co., LTD. (**Table S1**). PCR amplification  
33 system contained complementary primers and used KOD-Plus-Neo DNA polymerase to amplification  
34 sequence. PCR program involved an initial pre-denaturation at 94°C for 4 min, followed by  
35 amplification for 25 cycles with denaturation at 98°C for 10 s, annealing at 55°C for 15 s and  
36 elongation at 72°C for 5 min, and then further elongation at 72°C for 10 min. The plasmids verified  
37 by nucleic acid glue and digested with 1 μL of DpnI for 0.5 h at 37°C to remove the methylated  
38 templates. Then 10 μL of the digestion mixture were transformed into *E. coli* BL21 (DE3). Single

39 colonies were picked up and cultivated in LB medium (50 µg/mL Kan). The plasmids of mutations  
 40 were confirmed by sequencing.

41 **Table S1.** List of primers

| Primer                      | Sequence                     |
|-----------------------------|------------------------------|
| P450 <sub>TT</sub> -C385H-1 | GCCGAGGTGCTGATGGGCGCCGTAACC  |
| P450 <sub>TT</sub> -C385H-2 | CATCAGCACCTCGGCCGTAACCTCGG   |
| P450 <sub>TT</sub> -C385S-1 | CATCAGAGCCTCGGCCGTAACCTCGG   |
| P450 <sub>TT</sub> -C385S-2 | GCCGAGGCTCTGATGGGCGCCGTAACC  |
| P450 <sub>JT</sub> -C377S-1 | CATCAGAGCATGGGCAAAAACATCGGC  |
| P450 <sub>JT</sub> -C377S-2 | GCCCATGCTCTGATGGGCACCATAGCCG |
| P450 <sub>JT</sub> -C377H-1 | CATCAGCACATGGGCAAAAACATCGGC  |
| P450 <sub>JT</sub> -C377H-2 | GCCCATGTGCTGATGGGCACCATAGCC  |
| CYP505A30-C411S-1           | CGTGCGAGCATCGGGCGTCCTTTCGCG  |
| CYP505A30-C411S-2           | CCCGATGCTCGCACGCATACCAGTACCG |
| CYP505A30-C411H-1           | CGTGCGCACATCGGGCGTCCTTTCGCG  |
| CYP505A30-C411H-2           | CCCGATGTGCGCACGCATACCAGTACC  |
| CYP505X-C414H-1             | CGCGCACACATTGGTCGTCCGTTTGCG  |
| CYP505X-C414H-2             | ACCAATGTGTGCGCGCATACCGTTGCC  |
| CYP505X-C414S-1             | CGCGCAAGCATTGGTCGTCCGTTTGCG  |
| CYP505X-C414S-2             | ACCAATGCTTGCGCGCATACCGTTGCC  |
| CYP152K6-C365S-1            | CACCGCAGCGCTGGCGAATGGGTTACC  |
| CYP152K6-C365S-2            | GCCAGCGCTGCGGTGGCCCATGAAGTA  |
| CYP152K6-C365H-1            | CACCGCCACGCTGGCGAATGGGTTACC  |
| CYP152K6-C365H-2            | GCCAGCGTGGCGGTGGCCCATGAAGTA  |
| CviUPO-C20S-1               | GCTCCGAGCCCGGCTATGAACAGCCTG  |
| CviUPO-C20S-2               | AGCCGGGCTCGGAGCGCGAAATTCACCC |
| CviUPO-C20H-1               | GCTCCGCACCCGGCTATGAACAGCCTG  |
| CviUPO-C20H-2               | AGCCGGGTGCGGAGCGCGAAATTCACC  |

## 43 **1.5 Protein expression and purification**

44 Recombinant *E. coli* BL21 (DE3) including six P450s and variants were cultivated at 37°C and 180  
45 rpm in LB medium supplemented with 1% glucose. The cultures were grown until OD<sub>600</sub> reached  
46 0.6~0.8. Subsequently, they were induced with 0.2 mM isopropyl β-D-thiogalactopyranoside (IPTG)  
47 for gene expression. 2 mM FeSO<sub>4</sub> and 1 mM 5-aminolevulinic acid hydrochloride (ALA) were added  
48 for synthesis of iron porphyrin in the catalytic center of P450s. And further culture was conducted at  
49 16 °C, 120 rpm for 24 h. After culture, the culture medium was removed by centrifugation at 4000 rpm  
50 for 10 min. The induced cells were harvested by centrifugation (4°C, 8,000×g for 10 min) to be freeze-  
51 dried. When protein purification was required, the cells were resuspended in phosphate buffer A (25  
52 mM Tris-HCl, 300 mM NaCl, 20 mM imidazole, 5 mM β-mercaptoethanol, pH 7.4), then disrupted  
53 with ultra-sonication (work for 2 s, pause for 3 s, 150 W). The resulting supernatant was loaded onto  
54 a His-Trap HP nickel affinity column pre-equilibrated with buffer A using AKTA Avant System (GE  
55 Healthcare, USA), P450s were eluted off by a 20-300 mM imidazole gradient in buffer B (25 mM Tris-  
56 HCl, 300 mM NaCl, 300 mM imidazole, 5 mM β-mercaptoethanol, pH 7.4). The collected proteins  
57 were verified by SDS-PAGE analysis and then concentrated by an ultrafiltration tube. The target pure  
58 enzyme is subjected to the next experiment.

## 59 **1.6 Small-scale of carbenoid model reactions**

60 The reactions were initiated by adding 10 μL of styrene (1.2 M stock solution in methanol), followed  
61 by the addition of 10 μL of EDA (0.4 M stock solution in methanol) using a syringe under anaerobic  
62 conditions. The reaction mixture was stirred for 12 hours at 16°C. Upon completion of the reaction, it  
63 was terminated by adding an equal volume of 3 M HCl. The resulting solution was then centrifuged at  
64 12,000 rpm for 10 min to separate the phases. After centrifugation for 5 min, the solution was filtered  
65 using a 0.22 μm organic filter membrane. Subsequently, the analysis was performed using an  
66 ACQUITY UPC2 system by Waters Corporation, with a Trefoil CEL2 Supercritical Column (3.0 ×  
67 150 mm, 2.5 μm) employed. The mobile phase A consisted of a mixture of ethanol and acetonitrile.  
68 UV detection was carried out at a wavelength of 210 nm, with the column temperature maintained at  
69 30 °C. The flow rate was set at 1.2 mL/min, and an injection volume of 3 μL was used. It was  
70 recommended to conduct at least two parallel experiments for each group of reactions. The enzymatic  
71 cyclopropane reaction system consists of crude enzymes (**Table S2**) and purified enzymes (**Table S3**).

72

**Table S2.** Reaction system for crude enzymes

| Ingredients                     | Volume ( $\mu$ L) |
|---------------------------------|-------------------|
| Crude enzyme                    | 3444              |
| Styrene (1.2 M)                 | 33                |
| EDA (400 mM)                    | 50                |
| NaS <sub>2</sub> O <sub>4</sub> | 33                |

73

74

**Table S3.** Reaction system for purified enzymes

| Ingredients                     | Volume ( $\mu$ L) |
|---------------------------------|-------------------|
| Purified Enzyme                 | 10 $\mu$ M        |
| Styrene (1.2 M)                 | 33                |
| EDA (400 mM)                    | 50                |
| NaS <sub>2</sub> O <sub>4</sub> | 33                |
| Tris·HCl buffer (100 mM pH=8.0) | Filled up to 2000 |

75

## 76 1.7 Phylogenetic tree analysis, Sequence analysis, Molecular modeling and Simulation

77 Phylogenetic tree was constructed using is the maximum likelihood (ML) approach, and the  
78 software used is RAxML 8.2.12 and PhyloSuite.<sup>4,5</sup> Using P450<sub>BM3</sub>, myoglobin, and six self-sufficient  
79 P450s as templates, homologous sequences was searched on the NCBI website  
80 (<https://www.ncbi.nlm.nih.gov/>), incomplete and redundant sequences were removed, and the  
81 sequences based on sequence consistency were rename. Sequence alignment was performed using the  
82 multiple sequence alignment software MAFFT,<sup>6</sup> with specific parameters: FFT-NS-2 (default) strategy,  
83 Gap opening penalty, default: 1.53, Offset (works like gap extension penalty), default: 0.0. Before the  
84 tree constructed, it is essential to determine evolutionary model for the sequence using Model Finder.<sup>7</sup>  
85 Bayesian Information Criterion (BIC) was employed to identify the best-fitting substitution model  
86 among various evolutionary models: LG+G4. Finally, online phylogenetic tree editing tool ITOL v5  
87 (<https://itol.embl.de/>) was employed to beautify the tree.<sup>8</sup>

88

Sequence alignments and conserved analysis were conducted using online tool Clustal

89 (<https://www.genome.jp/tools-bin/clustalw>) and NCBI service (<https://www.ncbi.nlm.nih.gov/>). To  
90 further enhance the obtained results, online website ENDScript/ESPrp was utilized for beautification.<sup>9</sup>

91 With the exception of certain protein structures like P450<sub>TT</sub> and P450<sub>BM3</sub>, all molecular models  
92 were generated using AlphaFold 2. The analysis of interactions around the heme group was performed  
93 through Discovery Studio software. The enzyme-substrate complexes were further optimized using  
94 the CHARM force field in the Discovery Studio software package. The structures were visualized and  
95 generated using Pymol.

96

97

98 **2 Standard curve of product (EPC) using ultra-performance convergence chromatography**

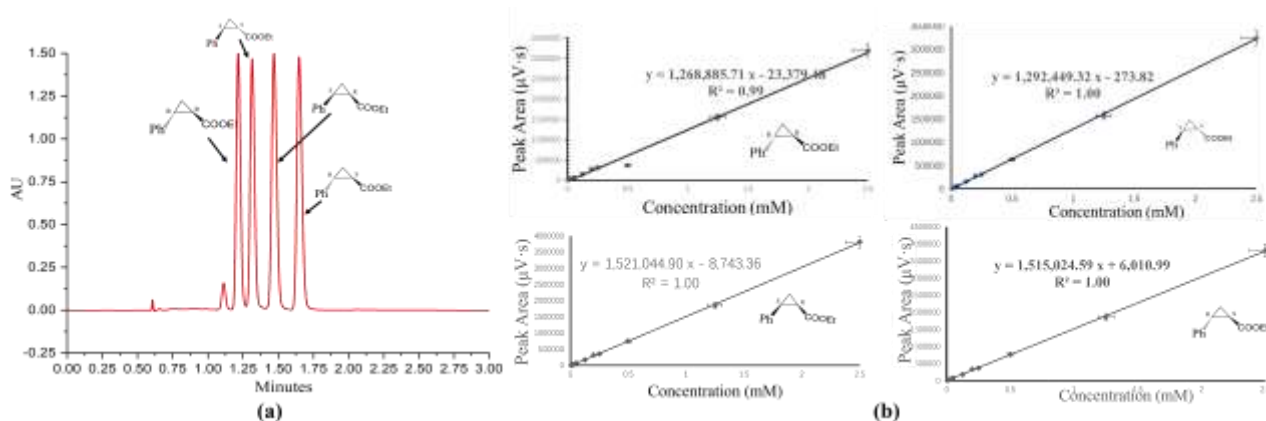

99

100 **Figure S1.** Analysis of ethyl 2-phenyl cyclopropane methane carboxylate (EPC) using ultra-  
 101 performance convergence chromatography. (a) The ultra-performance convergence chromatography  
 102 results for different configurations of EPC were as follows: (R, R)-EPC eluted at 1.216 min, (S, S)-  
 103 EPC eluted at 1.315 min, (S, R)-EPC eluted at 1.470 min, and (R, S)-EPC eluted at 1.649 min. (b)  
 104 Standard curve of different configurations of EPC analyzed by ultra-performance convergence  
 105 chromatography.

106

#### 4. Expression and purification of recombinant P450s

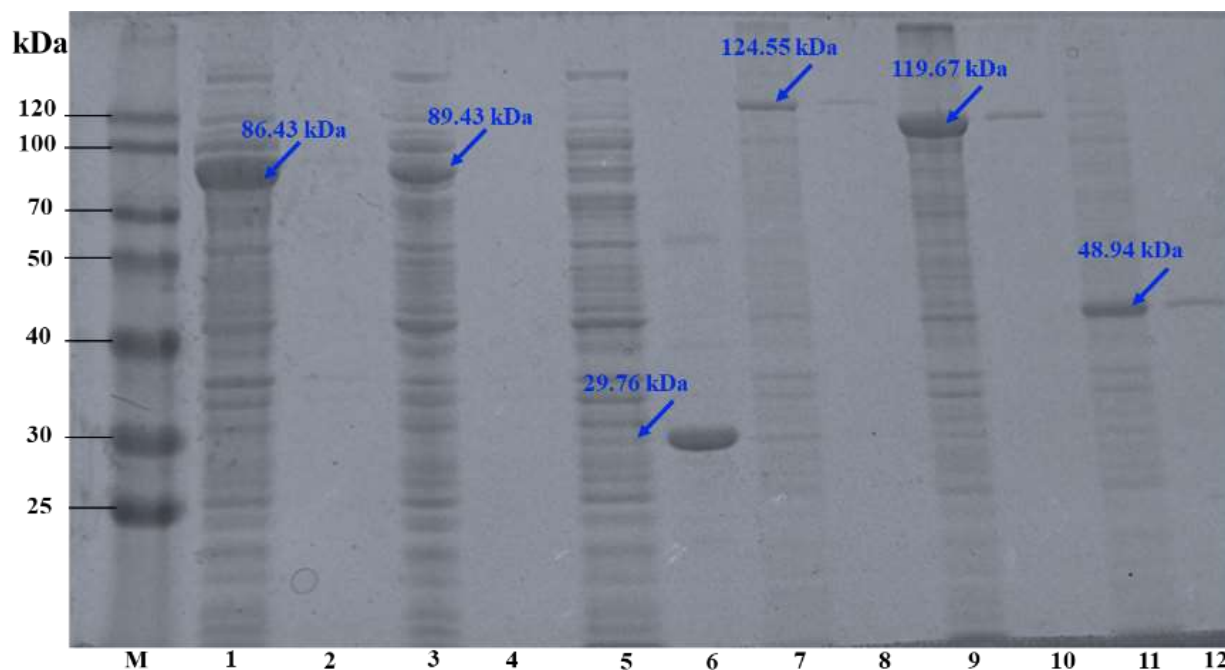

108

109 **Figure S2.** SDS-PAGE analysis of six recombinant P450s. The results showed that six different  
110 candidate genes for self-sufficient P450 skeleton enzymes were all soluble and in line with the  
111 expected protein size. M: protein Marker, lane 1~2: P450<sub>TT</sub> supernatant, precipitate; Lane 3~4: P450<sub>JT</sub>  
112 supernatant, precipitate; Lane 5~6: CviUPO supernatant, precipitate; Lane 7~8: CYP505X supernatant,  
113 precipitation; Lane 9~10: CYP505A30 supernatant, precipitate; Lane 11~12: CYP152K6 supernatant,  
114 precipitate

115



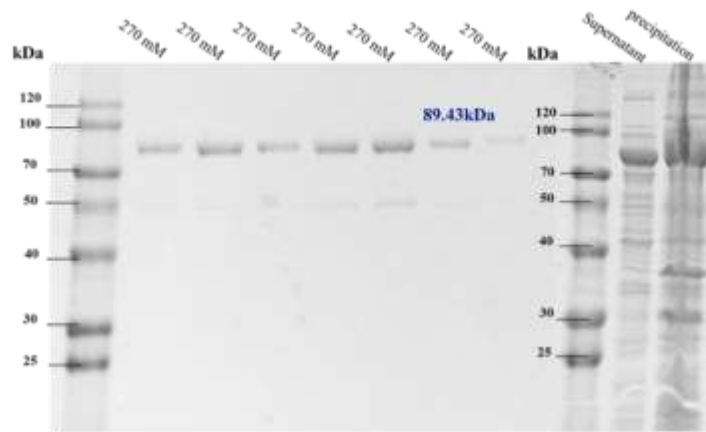

(a)

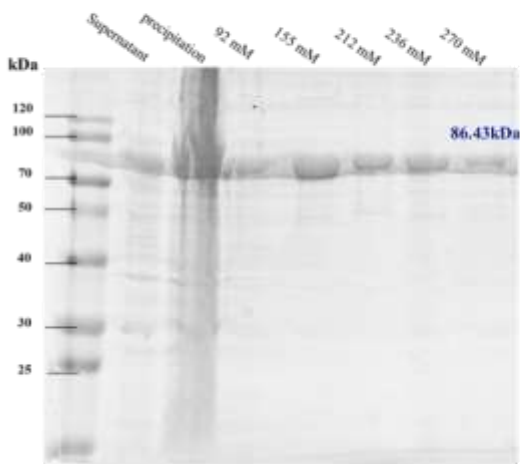

(b)

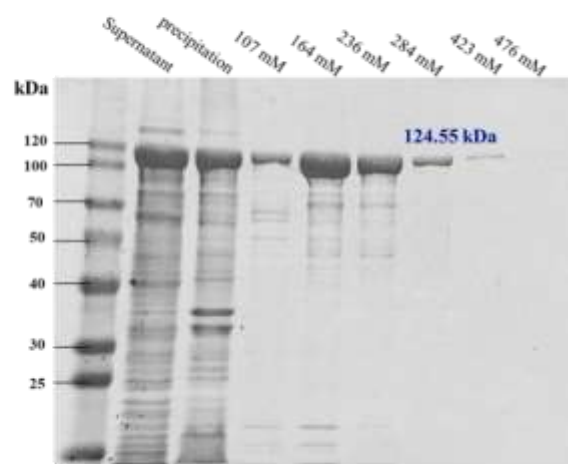

(c)

116

117 **Fig S3.** SDS-PAGE analysis of three purified self-sufficient P450 enzymes. (a) P450<sub>JT</sub>-WT. (b)

118 P450<sub>TT</sub>-C385S. (c) CYP505X-WT.

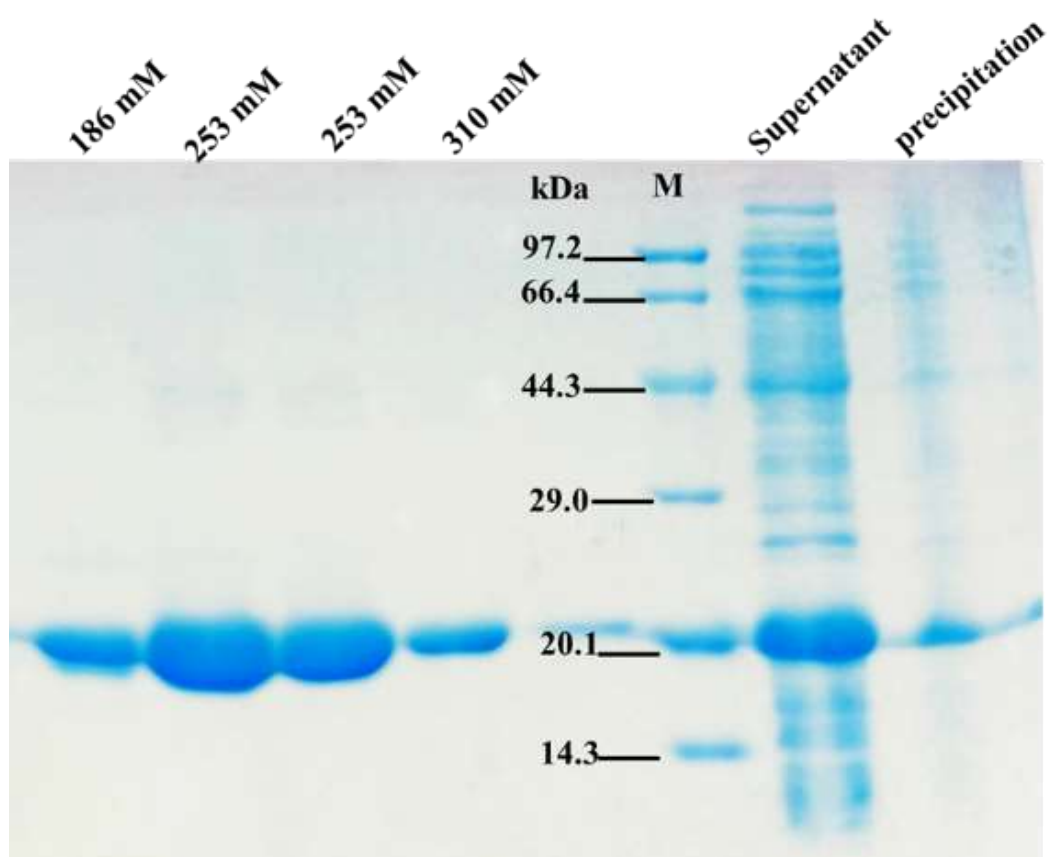

**Fig S4.** SDS-PAGE analysis of purified myoglobin

119

120

121

122

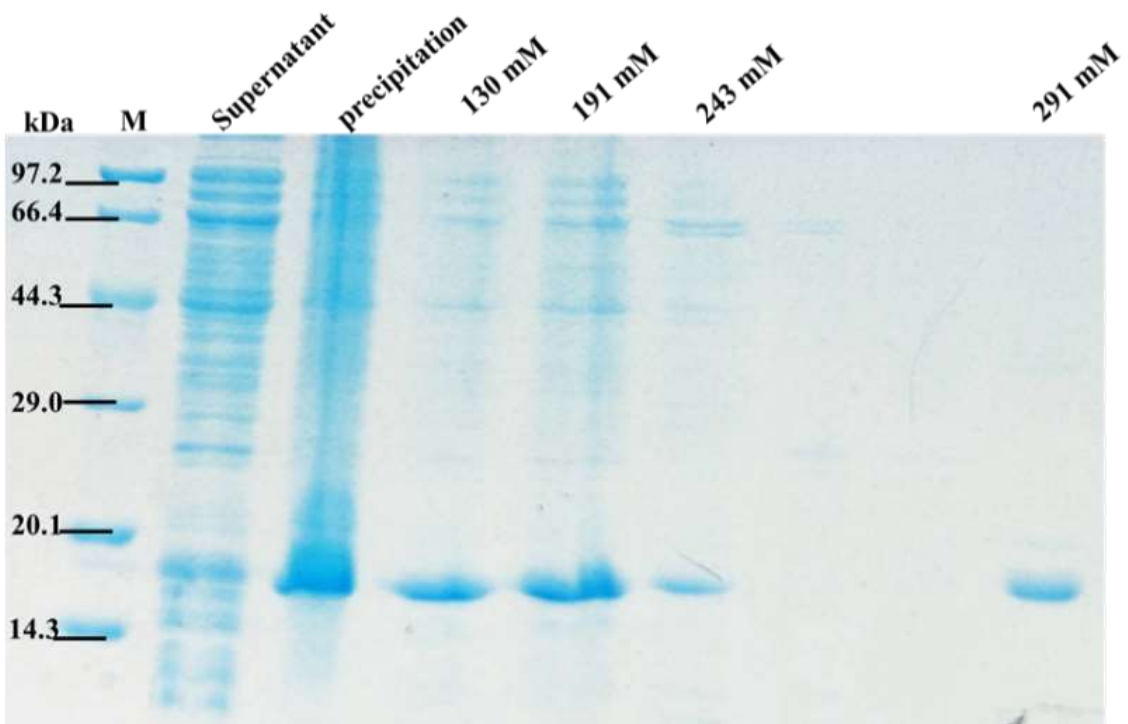

**Fig S5.** SDS-PAGE analysis of purified cytochrome C

123

124

125

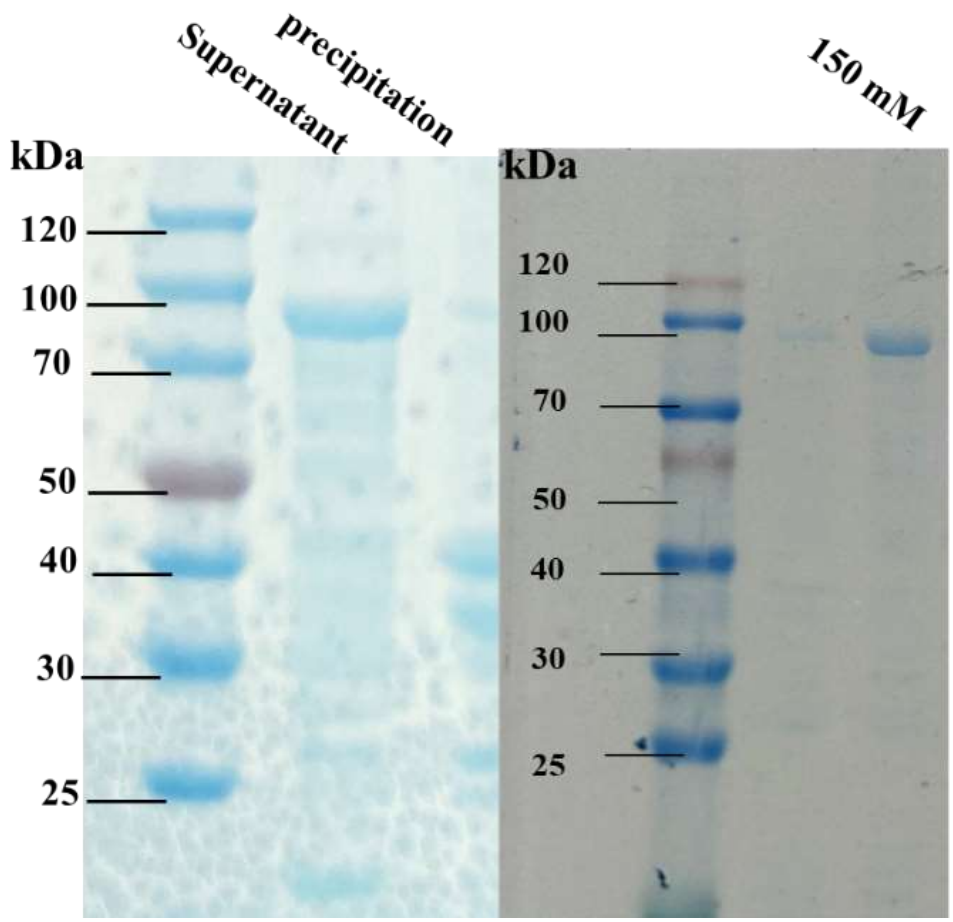

**Fig S6.** SDS-PAGE analysis of purified P450<sub>BM3</sub>

126

127

128

129

## 5. Comparison of carbenoid model reactions catalyzed by different self-sufficient P450s

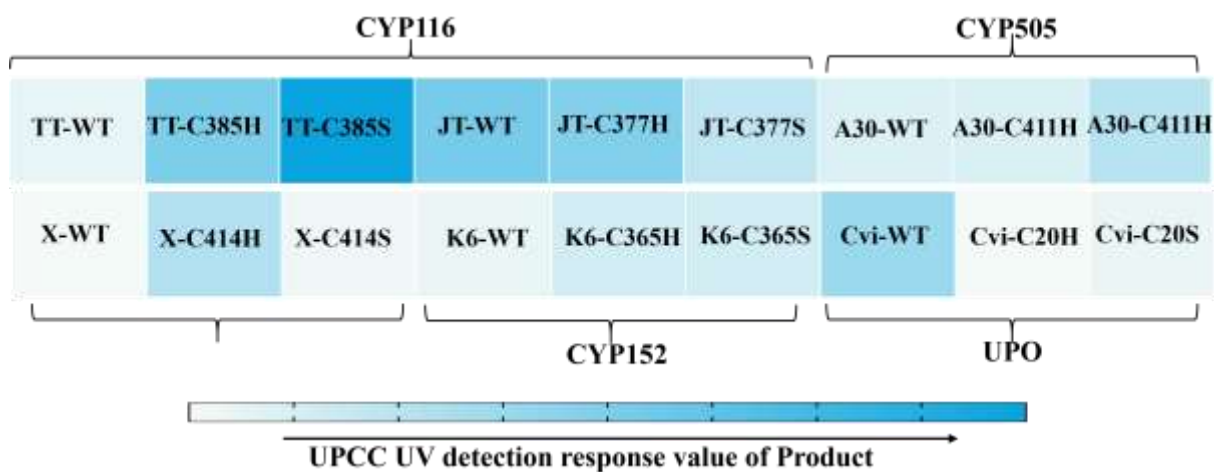

131 **Fig S7.** Fingerprint of carbenoid model reactions catalysed by different self-sufficient P450s.  
 132 Experiments were performed using crude extract of recombinant P450s. Catalyst were normalized  
 133 such that all lyophilized cells added to buffer in the same amount for ultrasonication. Product was  
 134 determined by ultra-performance convergence chromatography.

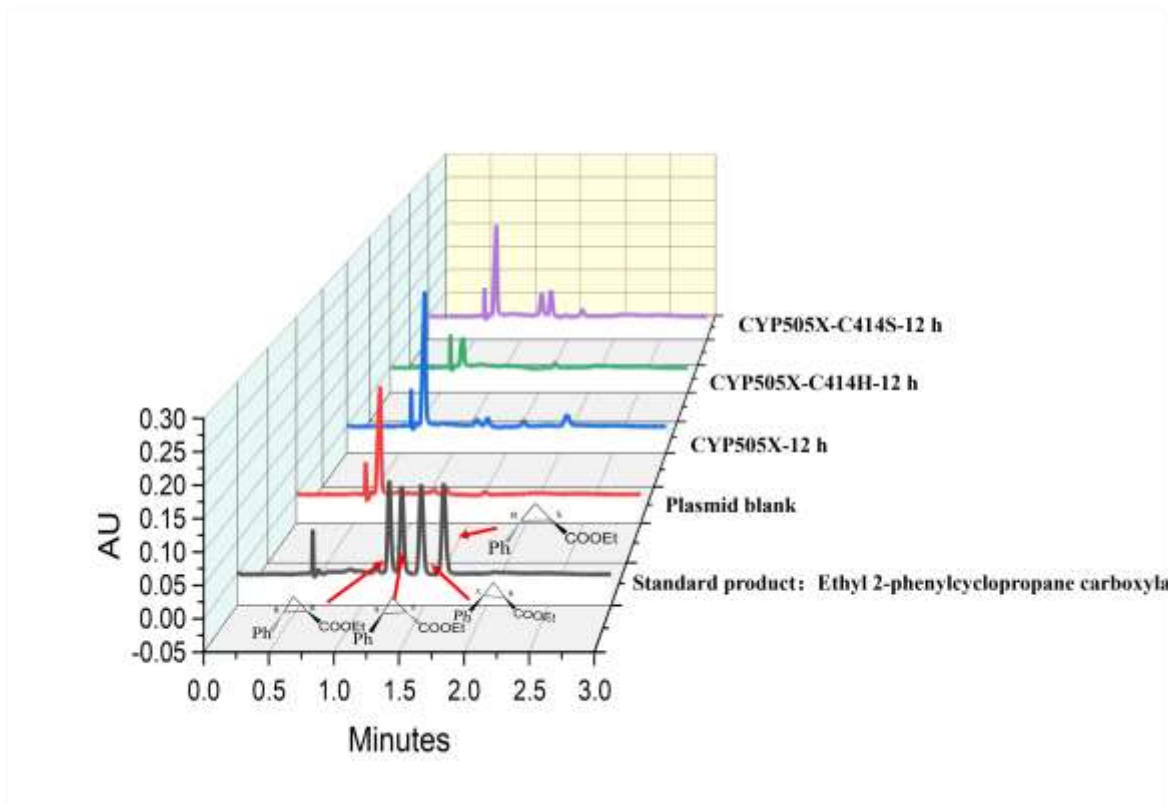

136  
 137  
 138  
 139

**Fig S8.** Ultra-performance convergence chromatography analysis of reactions catalyzed by crude enzymes of P450<sub>TT</sub> and its variants.

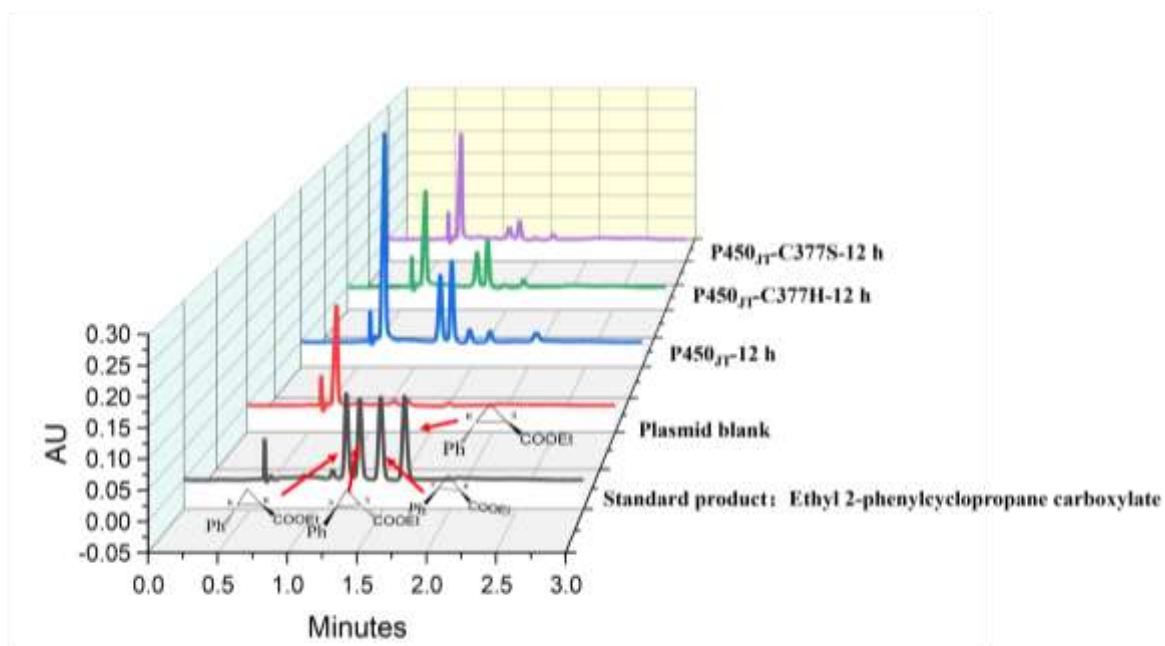

140

141 **Fig S9.** Ultra-performance convergence chromatography analysis of reactions catalyzed by crude  
 142 enzymes of P450<sub>JT</sub> and its variants.

143

144

145

146

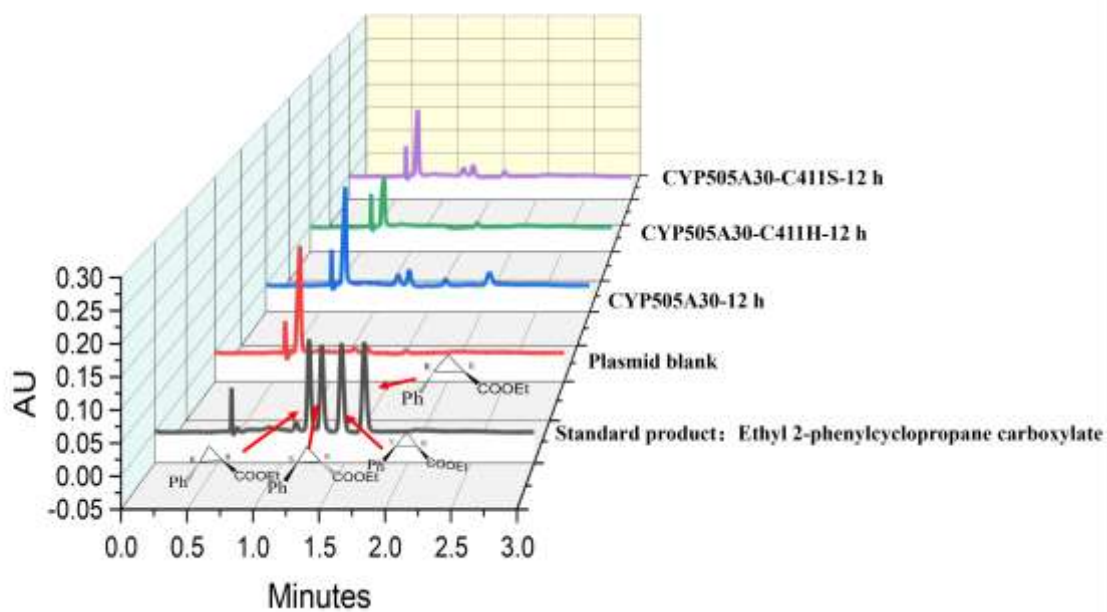

147

148 **Fig S10.** Ultra-performance convergence chromatography analysis of reactions catalyzed by crude

149 enzymes of CYP505A30 and its variants.

150

151



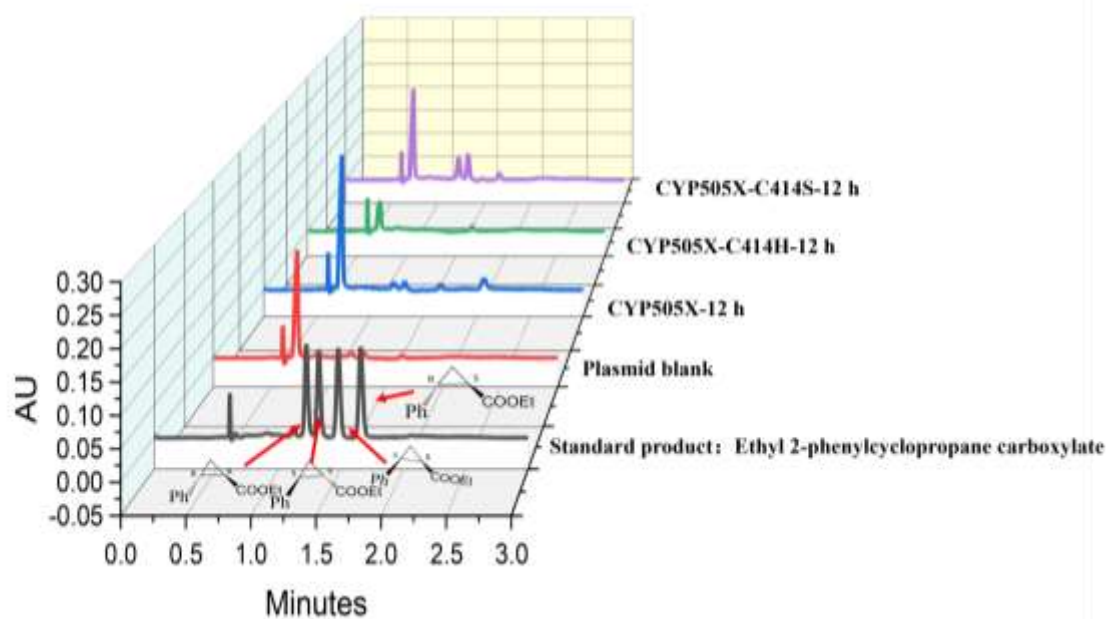

152  
 153  
 154  
 155  
 156  
 157  
 158

**Fig S11.** Ultra-performance convergence chromatography analysis of reactions catalyzed by crude enzymes of CYP505X and its variants.

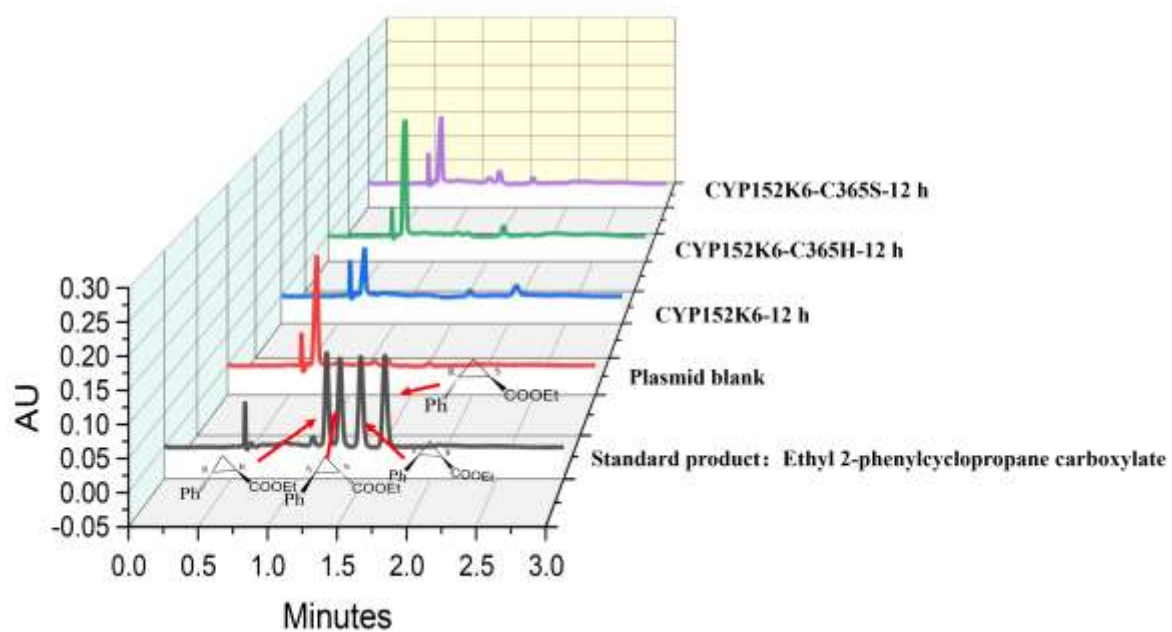

159

160

**Fig S12.** Ultra-performance convergence chromatography analysis of reactions catalyzed by crude enzymes of CYP152K6 and its variants.

161

162

163

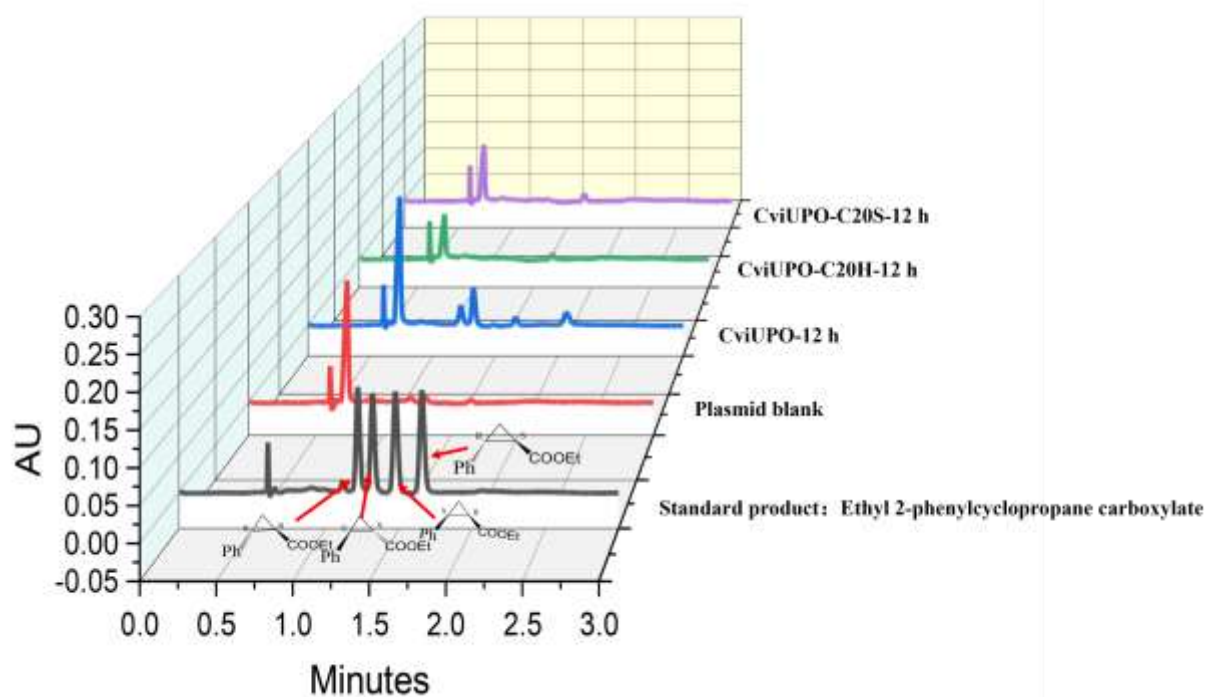

164

165 **Fig S13.** Ultra-performance convergence chromatography analysis of reactions catalyzed by crude  
 166 enzymes of CviUPO and its variants.  
 167

168 **6. Comparison of turnover frequencies (TOFs) and stereoselectivity of P450s**169 **Table S4.** Comparison of turnover frequencies (TOFs) and stereoselectivity of carbenoid model  
170 reaction catalyzed by different purified P450s

| Purified Enzymes          | TOF (min <sup>-1</sup> ) | de <sub>E</sub> (%) | ee <sub>cis</sub> (%) | ee <sub>trans</sub> (%) |
|---------------------------|--------------------------|---------------------|-----------------------|-------------------------|
| P450 <sub>TT</sub> -WT    | 0.75                     | 94.0                | 99.9                  | 79.8                    |
| P450 <sub>TT</sub> -C285H | 0.80                     | 95.4                | 99.9                  | 83.3                    |
| P450 <sub>TT</sub> -C285S | 1.50                     | 31.5                | 58.0                  | 20.9                    |
| P450 <sub>JT</sub> -WT    | 1.20                     | 50.7                | 68.0                  | 33.4                    |
| P450 <sub>JT</sub> -C377H | 0.45                     | 84.0                | 99.9                  | 56.7                    |
| P450 <sub>JT</sub> -C377S | 0.70                     | 83.3                | 93.5                  | 51.9                    |
| CYP505X                   | 0.95                     | 91.6                | 99.9                  | 75.8                    |
| P411-CIS                  | 0.40                     | 99.9                | 99.9                  | n.d.                    |
| P450-CIS                  | 0.30                     | 99.9                | 99.9                  | n.d.                    |
| Myoglobin                 | 0.50                     | 81.1                | 99.9                  | 99.9                    |
| Cytochrome C              | 0.30                     | 84.4                | 69.2                  | 99.9                    |

171



181 **Reference**

- 182 1. Z. J. Wang, H. Renata, N. E. Peck, C. C. Farwell, P. S. Coelho and F. H. Arnold, *Angew Chem Int Ed Engl*,  
183 2014, **53**, 6810-6813.
- 184 2. T. Heel, J. A. McIntosh, S. C. Dodani, J. T. Meyerowitz and F. H. Arnold, *Chembiochem*, 2014, **15**, 2556-  
185 2562.
- 186 3. S. B. J. Kan, X. Huang, Y. Gumulya, K. Chen and F. H. Arnold, *Nature*, 2017, **552**, 132-136.
- 187 4. A. Stamatakis, P. Hoover and J. Rougemont, *Syst Biol*, 2008, **57**, 758-771.
- 188 5. D. Zhang, F. L. Gao, I. Jakovlic, H. Zou, J. Zhang, W. X. Li and G. T. Wang, *Mol Ecol Resour*, 2020, **20**, 348-  
189 355.
- 190 6. K. Katoh, J. Rozewicki and K. D. Yamada, *Brief Bioinform*, 2019, **20**, 1160-1166.
- 191 7. S. Kalyanamoorthy, B. Q. Minh, T. K. F. Wong, A. von Haeseler and L. S. Jermin, *Nat Methods*, 2017, **14**,  
192 587-+.
- 193 8. I. Letunic and P. Bork, *Nucleic Acids Res*, 2021, **49**, W293-W296.
- 194 9. X. Robert and P. Gouet, *Nucleic Acids Res*, 2014, **42**, W320-W324.
- 195
